# Supplementary material for: A Tobacco-Derived Thymosinβ4 Concatemer Promotes Cell Proliferation and Wound Healing in Mice
Source: Hindawi journal article supplement (doi:10.1155/2016/1973413), 2016-01-01

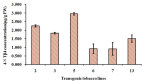

Supplement: f2 [file 1973413.f2.pdf]
