# Supplementary material for: A Tobacco-Derived Thymosinβ4 Concatemer Promotes Cell Proliferation and Wound Healing in Mice
Source: Hindawi journal article supplement (doi:10.1155/2016/1973413), 2016-01-01
Supplement: f5 [file 1973413.f5.pdf]

**Supplementary Table 1 the recipe of RPMI 1640 medium\***

| Contents                           | Molecular weight | Concentration(mg/L) | mM        |
|------------------------------------|------------------|---------------------|-----------|
| <b>Amino Acids</b>                 |                  |                     |           |
| Glycine                            | 75               | 10                  | 0.133     |
| L-Arginine                         | 174              | 200                 | 1.15      |
| L-Asparagine                       | 132              | 50                  | 0.397     |
| L-Aspartic Acid                    | 133              | 20                  | 0.15      |
| L-Cystine 2HCl                     | 313              | 65                  | 0.208     |
| L-Glutamic Acid                    | 147              | 20                  | 0.136     |
| L-Glutamine                        | 146              | 300                 | 2.05      |
| L-Histidine                        | 155              | 15                  | 0.0968    |
| L-hydroxyproline                   | 131              | 20                  | 0.153     |
| L-Isoleucine                       | 131              | 50                  | 0.382     |
| L-Leucine                          | 131              | 50                  | 0.382     |
| L-lysine hydrochloride             | 146              | 40                  | 0.274     |
| L-methionine                       | 149              | 15                  | 0.101     |
| L-phenylalanine                    | 165              | 15                  | 0.0909    |
| L-Proline                          | 115              | 20                  | 0.174     |
| L-Serine                           | 105              | 30                  | 0.286     |
| L-Threonine                        | 119              | 20                  | 0.168     |
| L-Tryptophan                       | 204              | 5                   | 0.0245    |
| L-Tyrosine disodium salt dehydrate | 261              | 29                  | 0.111     |
| L-valine                           | 117              | 20                  | 0.171     |
| <b>Vitamins</b>                    |                  |                     |           |
| Biotin                             | 244              | 0.2                 | 0.00082   |
| Choline chloride                   | 140              | 3                   | 0,0214    |
| D-Calcium pantothenate             | 477              | 0.25                | 0.000524  |
| Folic Acid                         | 441              | 1                   | 0.00227   |
| Niacinamide                        | 122              | 1                   | 0.0082    |
| Para-Aminobenzoic Acid             | 137              | 1                   | 0.0073    |
| Pyridoxine hydrochloride           | 206              | 1                   | 0.00485   |
| Riboflavin                         | 376              | 0.2                 | 0.000532  |
| Thiamine hydrochloride             | 337              | 1                   | 0.00297   |
| Vitamin B12                        | 1355             | 0.005               | 0.0000037 |
| i-Inositol                         | 180              | 35                  | 0.194     |
| <b>Inorganic Salts</b>             |                  |                     |           |
| Calcium nitrate(Ca)(NO3)2·4H2O     | 236              | 100                 | 0.424     |
| Magnesium Sulfate(MgSO4) anhydrous | 120              | 48.84               | 0.407     |
| Potassium Chloride(KCl)            | 75               | 400                 | 5.33      |
| Sodium Bicarbonate(NaHCO3)         | 84               | 2000                | 23.81     |

|                                                                           |     |      |        |
|---------------------------------------------------------------------------|-----|------|--------|
| Sodium Chloride(NaCl)                                                     | 58  | 6000 | 103.45 |
| Sodium Phosphate dibasic (Na <sub>2</sub> HPO <sub>4</sub> )<br>anhydrous | 142 | 800  | 5.63   |

|                         |     |      |         |
|-------------------------|-----|------|---------|
| <b>Other Components</b> |     |      |         |
| D-Glucose(Dextrose)     | 180 | 2000 | 11.11   |
| Glutathione             | 30  | 1    | 0.00326 |

\* From <https://www.baidu.com/>
